# Supplementary material for: Ultrafast, sensitive and visual sensing of copper ions by a dual-fluorescent film based on quantum dots
Source: Royal Society of Chemistry journal article supplement (doi:10.1039/c9tc04592a), 2019-01-01
Supplement: c9tc04592a1.pdf [file c9tc04592a1.pdf]

## Supporting Information for

# Ultrafast, Sensitive and Visual Sensing of Copper Ions by a Dual-Fluorescent Film Based on Quantum Dots

Ting Han, Ye Yuan, Hong Kang, Yang Zhang and Lijie Dong\*

Center for Smart Materials and Devices, State Key Laboratory of Advanced Technology for Materials Synthesis and Processing, Wuhan University of Technology, Luoshi Road 122, Wuhan 430070, P.R. China.

email: dong@whut.edu.cn

### Experimental section

**Synthesis of QDs<sub>g</sub> (CdSe/Cd<sub>x</sub>Zn<sub>1-x</sub>S QDs):** QDs<sub>g</sub> were obtained according to a typical synthetic procedure.<sup>1</sup> Briefly, 0.2 mmol of CdO, 4 mmol of zinc acetate, 5 mL oleic acid, and 15 mL 1-octadecene were loaded into a 100 mL three-neck flask, and heated to 150 °C, degassed under 100 mTorr pressure for 30 min, filled with N<sub>2</sub> gas, and further heated to 310°C under nitrogen flow to form a clear solution of Cd(OA)<sub>2</sub> and Zn(OA)<sub>2</sub>. At this temperature, 0.1 mmol of Se powder and 4.0 mmol of S powder both dissolved in 2.0 mL of TOP ( trioctylphosphine) were quickly injected into the reaction flask. After injection, the temperature was reduced to 300 °C for the growth of QDs, and it was then cooled to room temperature to stop the growth, QDs<sub>g</sub> were obtained.

**Synthesis of QDs<sub>r</sub> (CdSe/CdS/ZnS QDs):** QDs<sub>r</sub> were prepared by following a previously reported work.<sup>2</sup> Briefly, Cd-SA stock solutions were heated and pumped vacuum and purged with nitrogen gas. Then injected TBP-Se (tributylphosphine-selenium) precursor pre-calculated into the Cd-SA (stearic acid) stock solutions. After getting CdSe-core particles, the successive ion layer adsorption and reaction (SILAR) technique was used to grow complex shells. A calculated amount of a given precursor solution was injected using standard air-free procedures, QDs<sub>r</sub> were obtained.

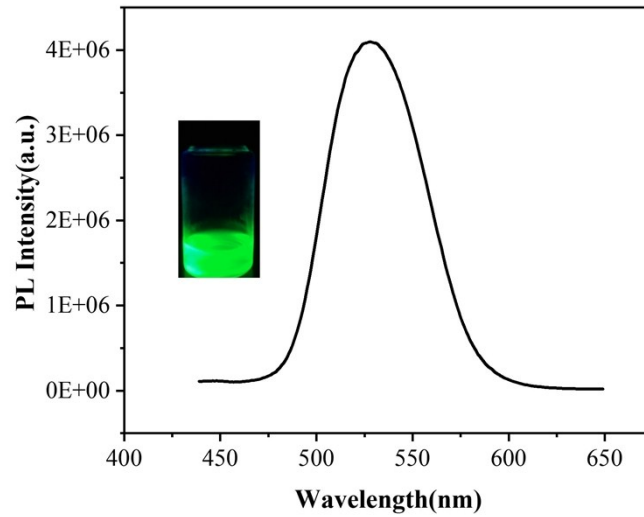

**Fig. S1.** Fluorescence spectra of QDs<sub>g</sub>. The inset is digital photo of QDs<sub>g</sub> dispersed in chloroform

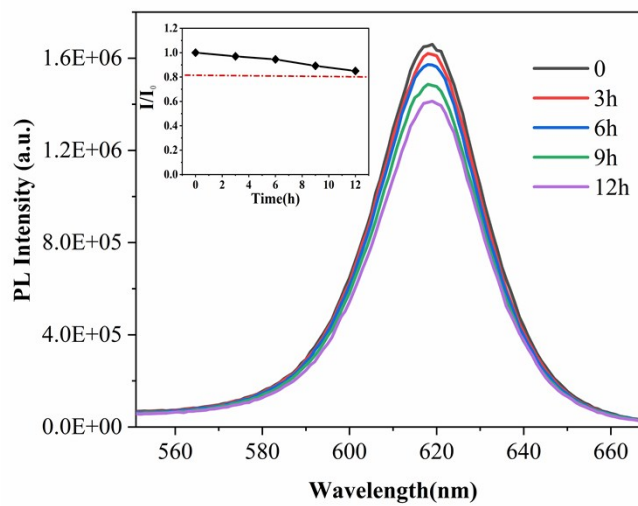

**Fig. S2.** Fluorescence spectra of QDs<sub>r</sub>-PEI in aqueous dispersion at 60°C for different time. The inset is the ratio of PL intensity with time.  $I_0$  and  $I$  represent the PL intensity of the original QDs<sub>r</sub>-PEI and QDs<sub>r</sub>-PEI with treatment, respectively.

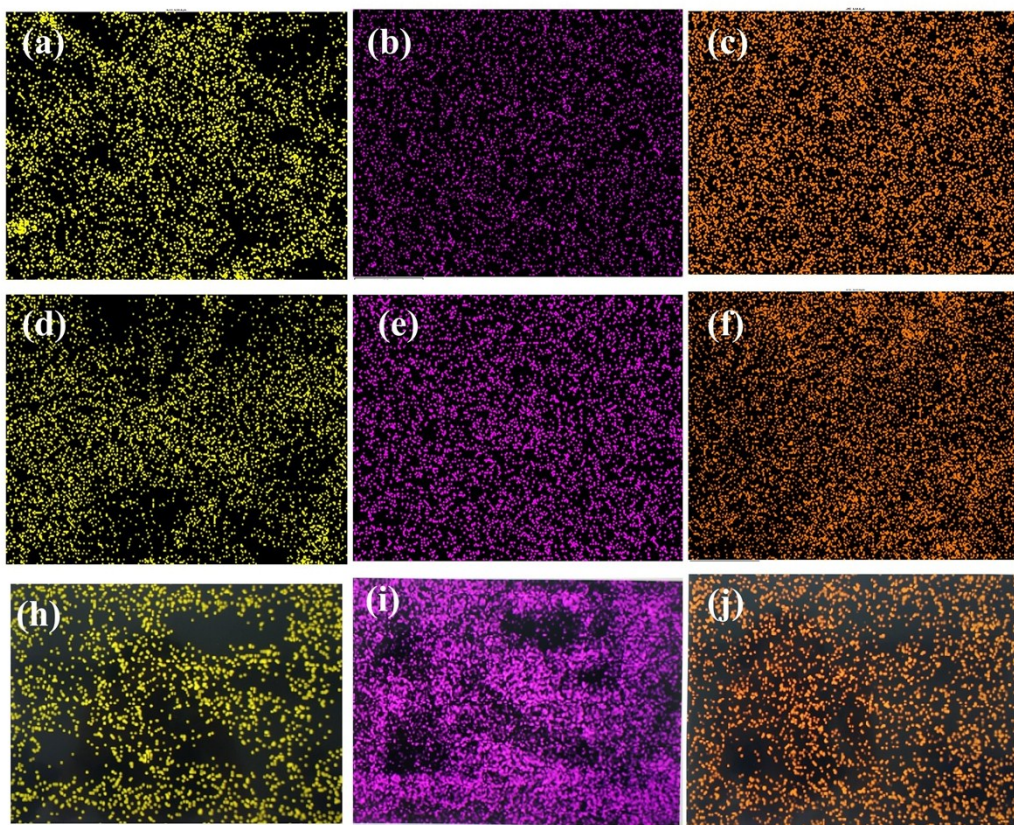

**Fig. S3.** (a)~(c) EDS mapping of Zn, Cd and Se element in QDs<sub>g</sub>/PVDF. (d)~(f) EDS mapping of Zn, Cd and Se element in (QDs<sub>g</sub>/PVDF)@QDs<sub>r</sub>. (h)~(f) EDS mapping of Zn, Cd and Se element in (QDs<sub>g</sub>/PVDF)@QDs<sub>r</sub>-PEI.

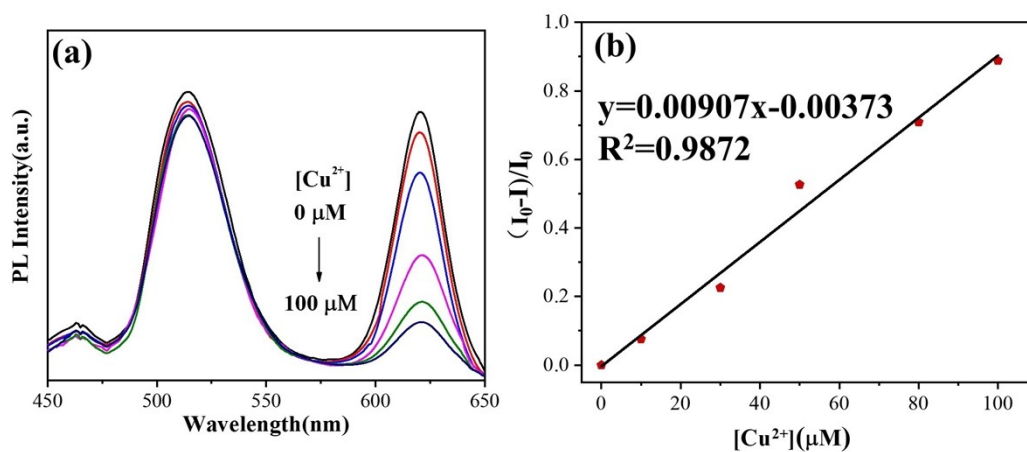

**Fig. S4.** (a) Fluorescence spectrum of (QDs<sub>g</sub>/PVDF)@QDs<sub>r</sub> film toward Cu<sup>2+</sup> at different concentration. (b) the concentration dependence for the fluorescence quenching of fluorescent films by Cu<sup>2+</sup>.

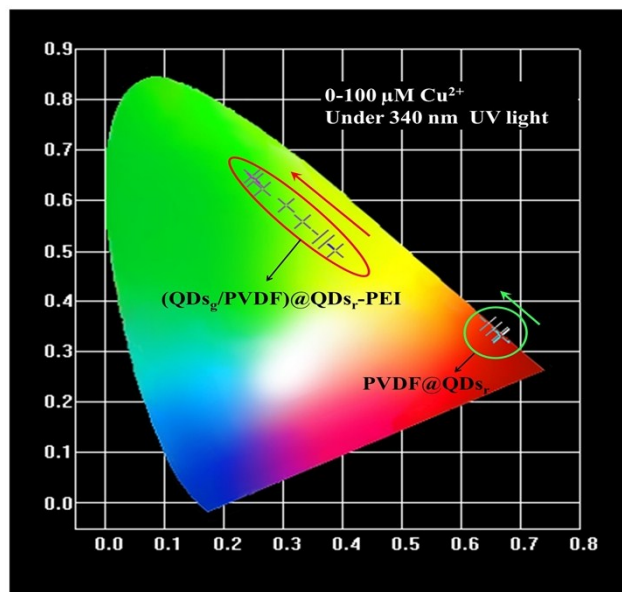

**Fig. S5.** CIE 1931 diagram of  $\text{PVDF}@\text{QDs}_r$  and  $(\text{QDs}_g/\text{PVDF})@\text{QDs}_r\text{-PEI}$  film toward  $\text{Cu}^{2+}$  at different concentration excited at 340 nm.

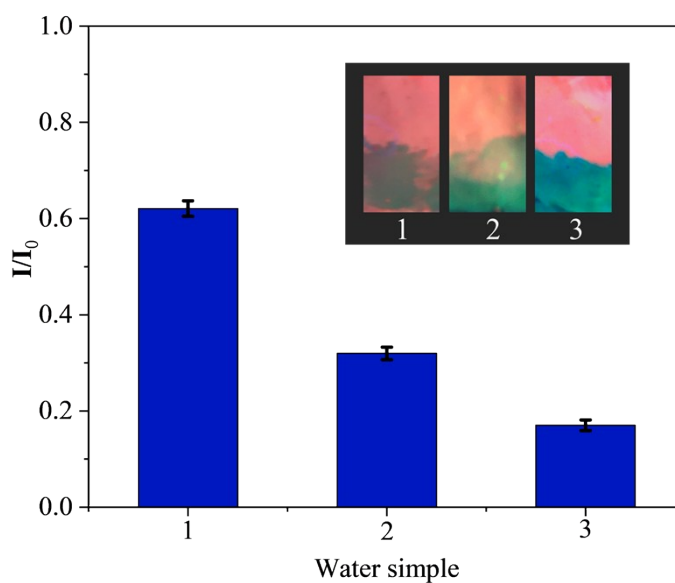

**Fig. S6.** The ratio of PL intensity at 620 nm of fluorescent films toward different water simples and the original fluorescent film. Simple 1-3 are  $3.18 \mu\text{M}$ ,  $6.40 \mu\text{M}$  and  $7.72 \mu\text{M}$   $\text{Cu}^{2+}$  in river water, respectively. The inset is digital photos of fluorescent films toward different water simples under 365 nm UV light

1 Q. Feng, L. Dong, J. Huang, Q. Li, Y. Fan, J. Xiong, C Xiong, *Angew. Chem. Int. Ed.* 2010, 49, 9943-9946.

2 W.K. Bea, K. Char, H. Hur, S. Lee, *Chem.Mater.* 2008, 20, 531.
